# Supplementary material for: β-Catenin/Tcf7l2–dependent transcriptional regulation of GLUT1 gene expression by Zic family proteins in colon cancer
Source: PubMed Central journal article supplement — Sci Adv. 2019 Jul 31;5(7):eaax0698. doi: 10.1126/sciadv.aax0698 (PMC6669021; doi:10.1126/sciadv.aax0698), 2019-07-31
Supplement: aax0698_SM.pdf [file aax0698_SM.pdf]

## Supplementary Materials for

### **$\beta$ -Catenin/Tcf7l2–dependent transcriptional regulation of GLUT1 gene expression by Zic family proteins in colon cancer**

Zibo Zhao, Lu Wang, Elizabeth Bartom, Stacy Marshall, Emily Rendleman, Caila Ryan, Anthony Shilati, Jeffrey Savas, Navdeep Chandel, Ali Shilatifard\*

\*Corresponding author. Email: [ash@northwestern.edu](mailto:ash@northwestern.edu)

Published 31 July 2019, *Sci. Adv.* **5**, eaax0698 (2019)  
DOI: 10.1126/sciadv.aax0698

#### **The PDF file includes:**

Fig. S1. Potential prognostic value of Zic5 in colon cancer.  
Fig. S2. Generation of our homemade antibodies against Zic5 for ChIP-seq analysis.  
Fig. S3. Comparative ChIP-seq analysis of ZIC5 in HCT116 ZIC5 WT and KO cells.  
Fig. S4. Loss of Zic5 derepresses *GLUT1/SCL2A1* gene expression.  
Fig. S5.  $\beta$ -Catenin/Tcf7l2 complex recruits Zic5 to regulate gene expression.  
Fig. S6. Comparative ChIP-seq analysis of ZIC2 in HCT116 ZIC2 WT and KO cells.  
Legend for table S1

#### **Other Supplementary Material for this manuscript includes the following:**

(available at [advances.sciencemag.org/cgi/content/full/5/7/eaax0698/DC1](https://advances.sciencemag.org/cgi/content/full/5/7/eaax0698/DC1))

Table S1 (Microsoft Excel format). Mass spectrometry data.

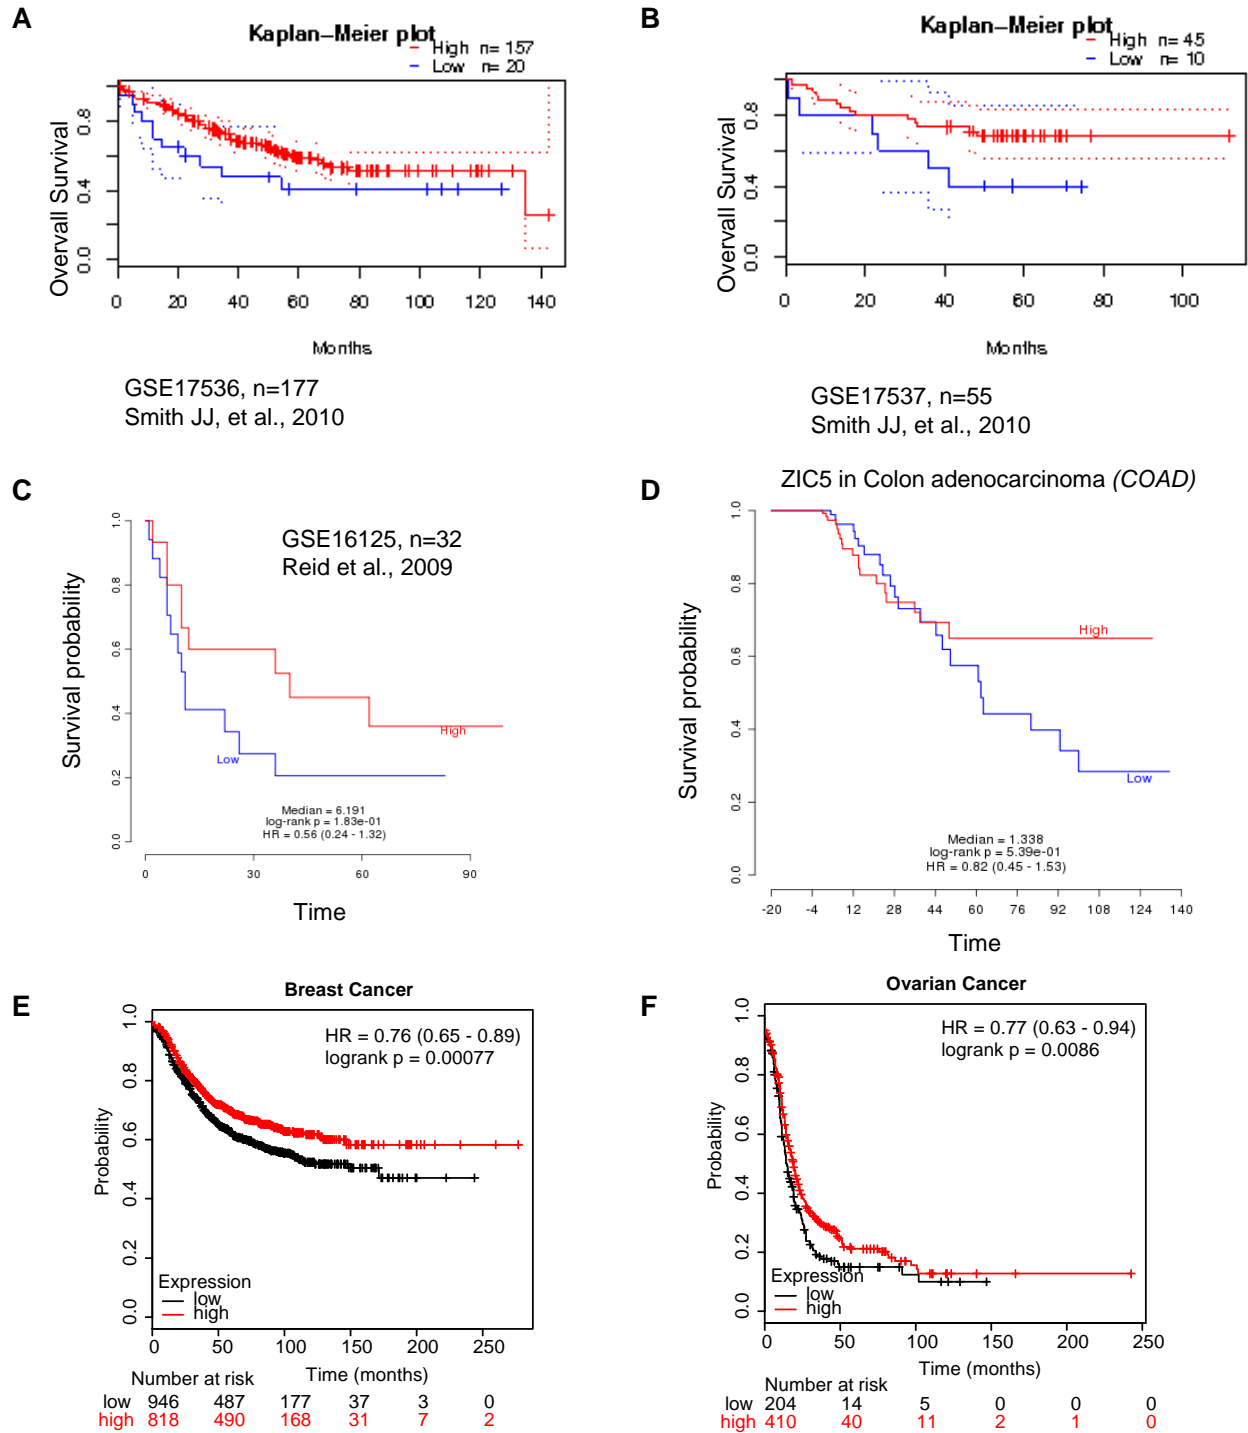

Fig. S1. Potential prognostic value of Zic5 in colon cancer.

|          |       |     |                                                                  |     |
|----------|-------|-----|------------------------------------------------------------------|-----|
| <b>A</b> | mouse | 1   | MMEPPLSKRNPPALRLADLATAQAQOLQNMGTGFPVLVGGPPAHSORRAVAMHLHPRDLGTD   | 60  |
|          | human | 24  | +MEPPLSKRNPPALRLADLATAQ Q LQNMGTGFP L GPPAHSQ RA HL RDLG D       | 83  |
|          | mouse | 61  | PGVASTALGPEHMAQASGGQPCPPSQGLPGLSQVPAPAARSVASGTHPGARTHDPDGGGSS    | 120 |
|          | human | 84  | PGVA+T LGPEHMAQAS G PPSQ P + PA AAR+ A HPGA ++P GGGSS            | 143 |
|          | mouse | 121 | PGVATTLGPEHMAQASTLGLSPPSQAFPAHPEAPAAAAARAALVAHPGAGSYPCGGGSS      | 180 |
|          | human | 144 | GAQASAPPPAPPLPPSQSSSPPPPPPPPALSGYTATNSGGGSSSGKGHSRDFVLRDL        | 203 |
|          | mouse | 181 | GAQ SAPPPAPPLPP+ S PPPPPPPALSGYT TNSGGG SSGKGHSRDFVLRDL          | 239 |
|          | human | 204 | SATAPAAAAMHGAPLGGEQRSQHPHTPPHPAGMFISASGTYAGR DG -GGSALFPAL       | 263 |
|          | mouse | 240 | SATAPAAAAMHGAPLGGEQRSQHPHTPPHPAGMFISASGTYAGD G GG ALFPAL         | 296 |
|          | human | 264 | HDSPGAPGGHP -- LNGQMLRLGLAAAAAAA - ELYGRAEPPFAPRSGDAHYGAVAAAAAAA | 323 |
|          | mouse | 297 | HD+PGAPGGHP LNGQMLRLGLAAAAAAA ELYGRAEPPFAPRSGDAHYGAVAAAAAAA      | 352 |
|          | human | 324 | HDTPGAPGGHPHPLNGQMLRLGLAAAAAAA ELYGRAEPPFAPRSGDAHYGAVAAAAAAA     | 382 |
|          | mouse | 353 | LHGYGAVNLNLNLAIAAAAAAAAAAGPGPHLQHHAPPAPPPAPAPHPHHPH --- LPGAAG   | 401 |
|          | human | 383 | LHGYGAVNLNLN AAAAAAAAAAGPGPHLQHHAPPAPPP PAP H LPGAAG             | 442 |
|          | mouse | 402 | LHGYGAVNLNLN - LAAAAAAAAAGPGPHLQHHAPPAPPPPPAPAQHHPHQLHPHLPGAAG   | 461 |
|          | human | 443 | AFLRYMROPIKRELICKWLDPEELAG-----PPASADSGVKPCSKTFGTMHELVL          | 502 |
|          | mouse | 462 | AFLRYMRQPIK+ELICKW+DP+ELAG PP G KPCSKTFGTMHELVL                  | 521 |
|          | human | 503 | AFLRYMRQPIKQELICKWIDPELAGPPPPPPPPPPPPPPAGGAKPCSKTFGTMHELVL       | 562 |
|          | mouse | 522 | NHVTVEHVGGEQSSSHVCFWEDCPREGKPFKAKYKLNHIRVHTGEKPFPCPFPGCGKVF      | 581 |
|          | human | 563 | NHVTVEHVGGEQSSSHVCFWEDCPREGKPFKAKYKLNHIRVHTGEKPFPCPFPGCGKVF      | 622 |
|          | mouse | 582 | ARSENLIKIHKRTHTGEKPFKCFDGC DRKFANSSDRKKHSHVHTSDKPYCYCKIRGCDKSY   | 622 |
|          | human | 623 | ARSENLIKIHKRTHTGEKPFKCFDGC DRKFANSSDRKKHSHVHTSDKPYCYCKIRGCDKSY   | 663 |

Zic5CT289: 545 – 622 aa (mouse)  
 Zic5 FL290: 358 – 622 aa (mouse)

**B**

|                         | # Peaks |
|-------------------------|---------|
| WT.289                  | 10081   |
| WT.289.specific         | 7040    |
| WT.290                  | 7895    |
| WT.290.specific         | 3475    |
| WT.289.sp AND WT.290.sp | 3475    |

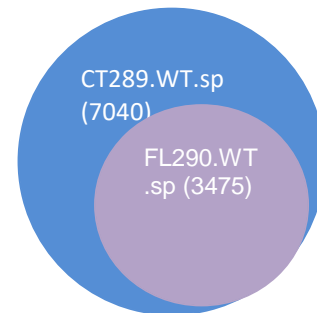

**Fig. S2. Generation of our homemade antibodies against Zic5 for ChIP-seq analysis.**

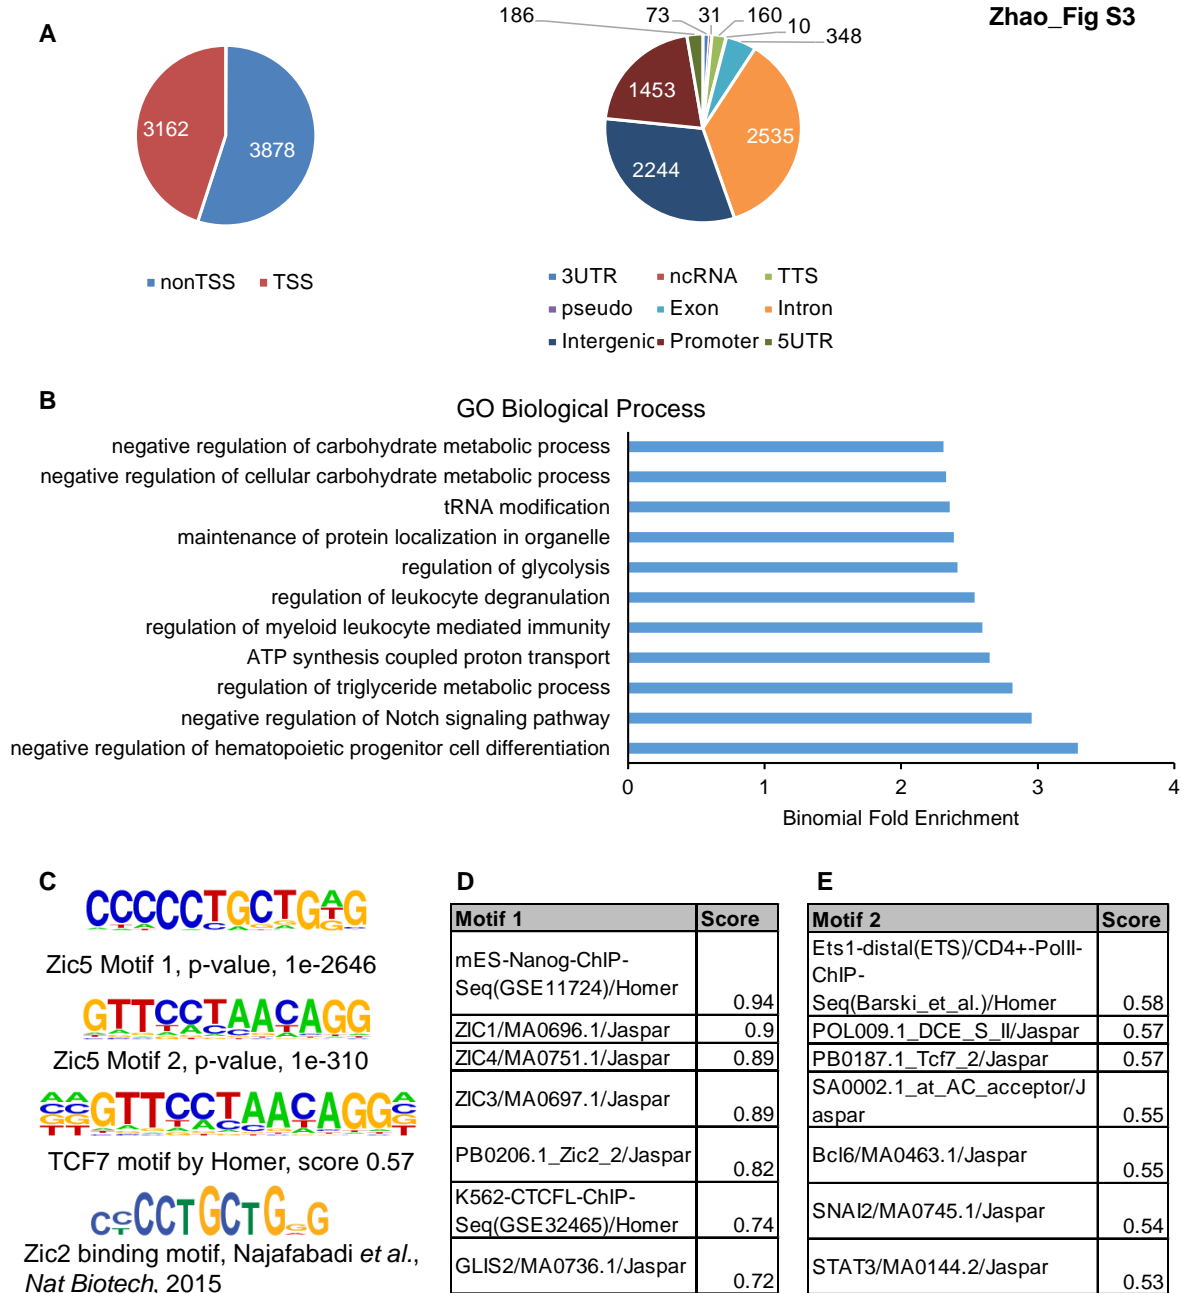

Fig. S3. Comparative ChIP-seq analysis of ZIC5 in HCT116 ZIC5 WT and KO cells.

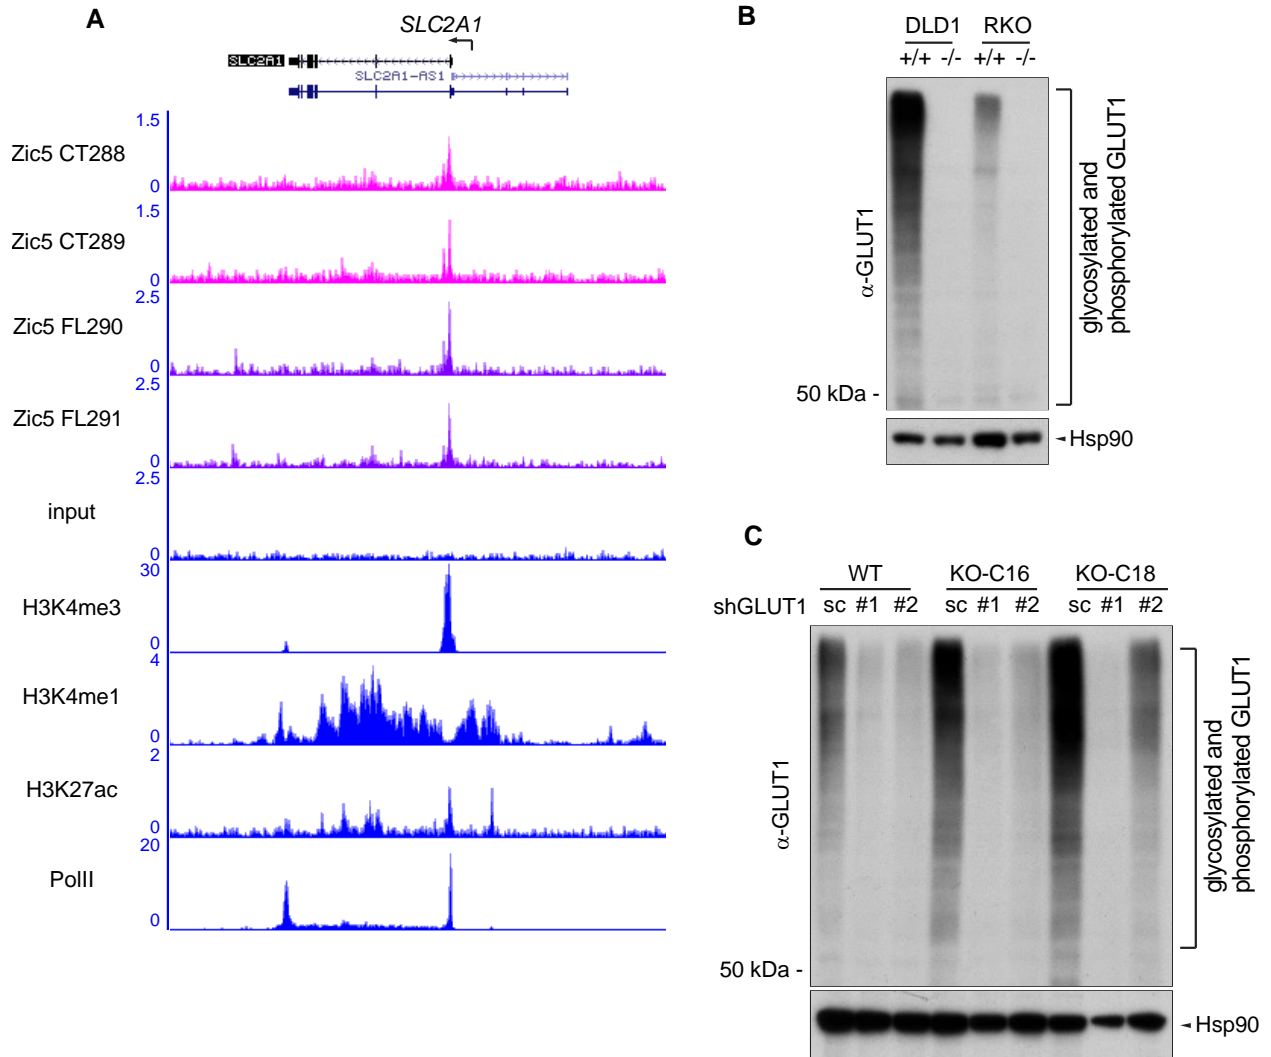

**Fig. S4. Loss of Zic5 derepresses *GLUT1/SCL2A1* gene expression.**

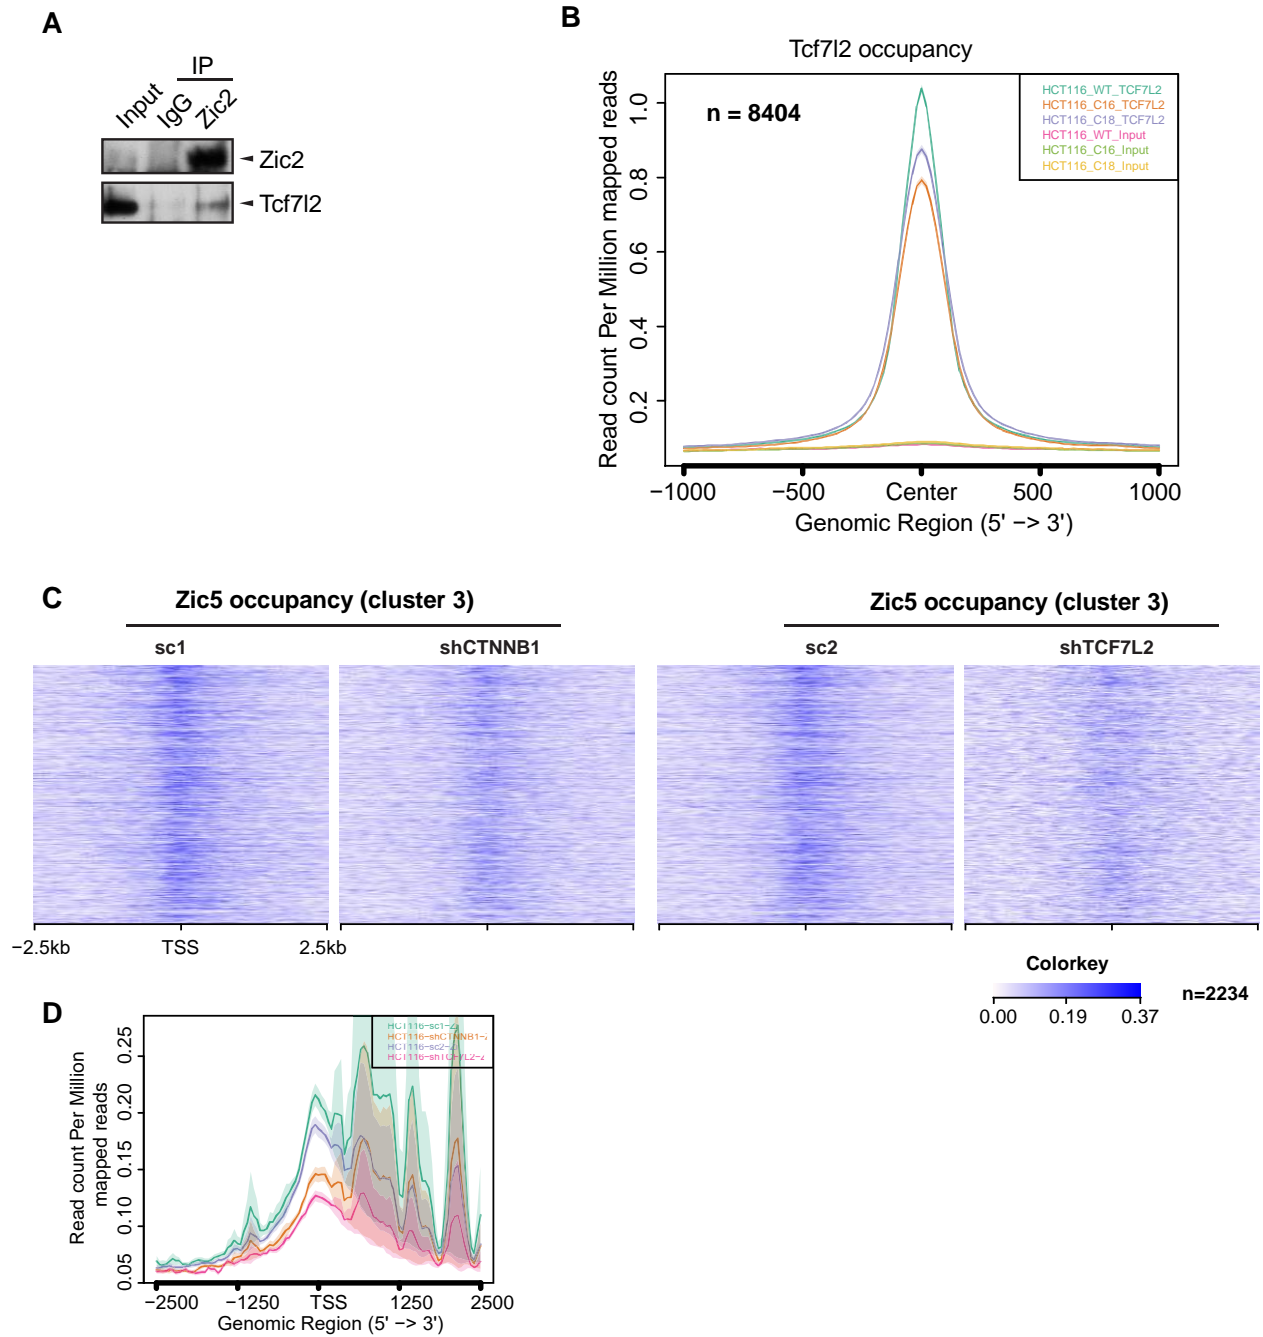

Fig. S5.  $\beta$ -Catenin/Tcf7l2 complex recruits Zic5 to regulate gene expression.

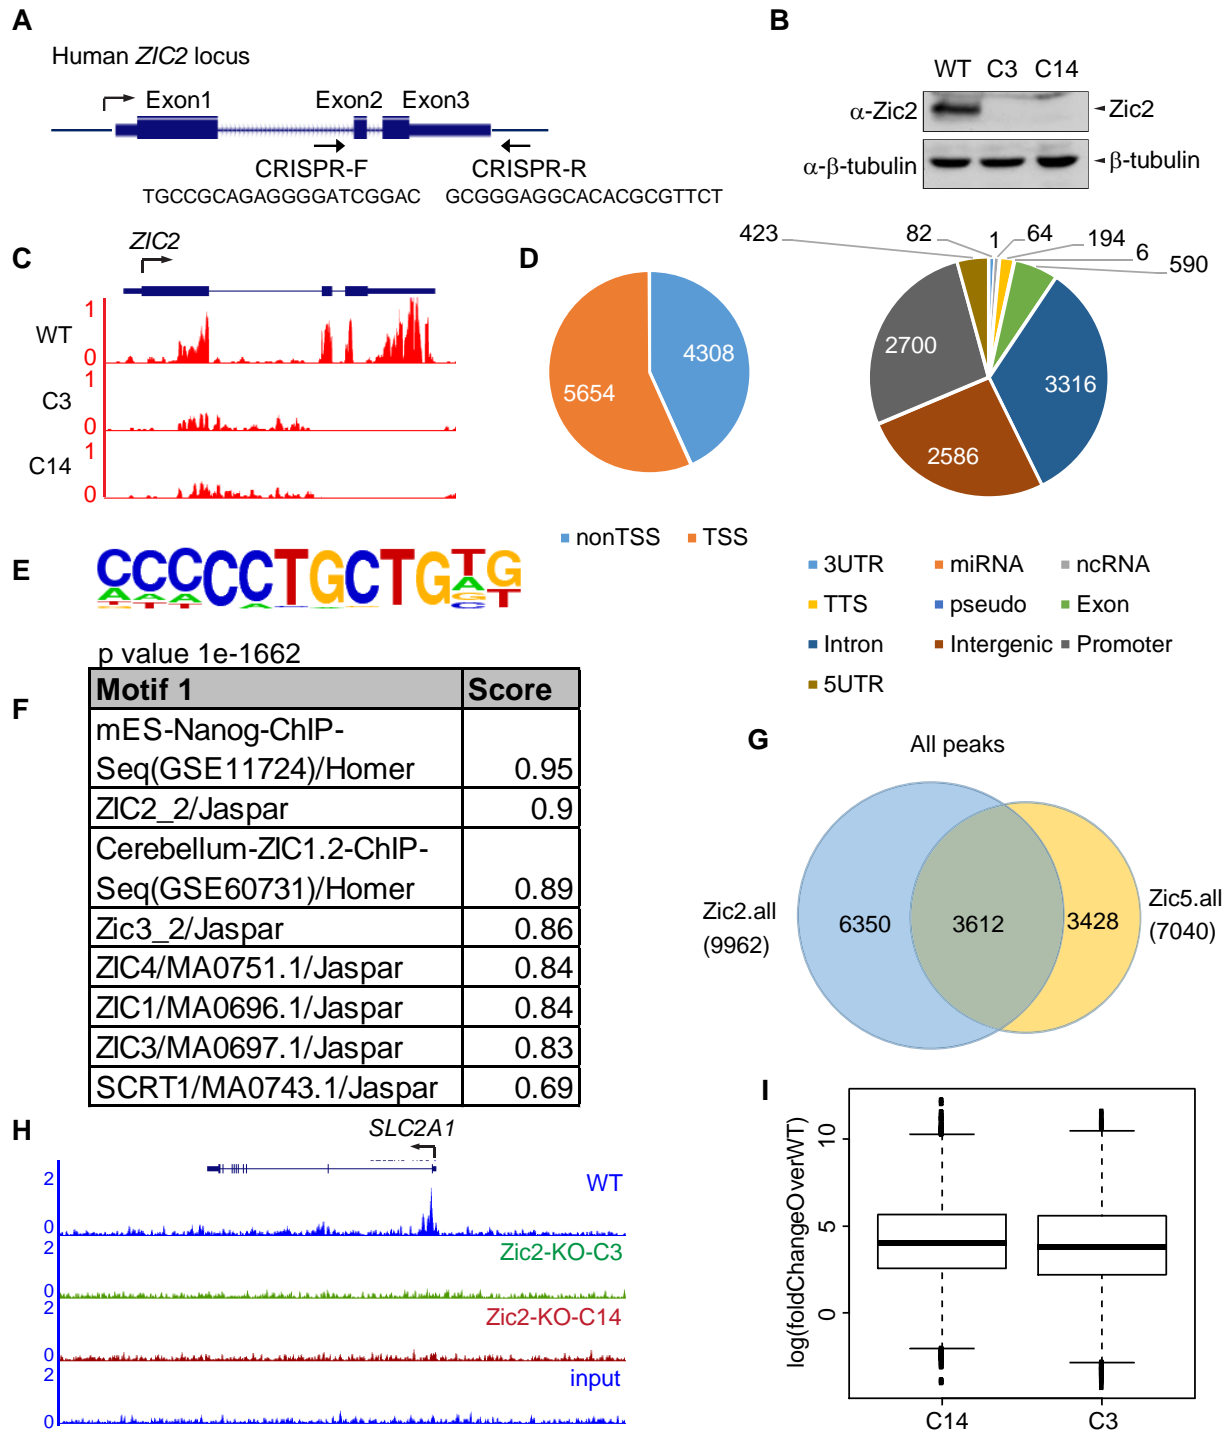

Fig. S6. Comparative ChIP-seq analysis of ZIC2 in HCT116 ZIC2 WT and KO cells.

Table S1. Mass spectrometry data.
